# Supplementary material for: Synthesis of antimicrobial cyclodextrins bearing polyarylamino and polyalkylamino groups via click chemistry for bacterial membrane disruption
Source: Royal Society of Chemistry journal article supplement (doi:10.1039/c3cc49543d), 2014-01-01
Supplement: c3cc49543d1.pdf [file c3cc49543d1.pdf]

Electronic Supplementary Information

## Synthesis of Antimicrobial Cyclodextrins Bearing Polyarylamino and Polyalkylamino Groups via Click Chemistry for Bacterial Membrane Disruption

Hatsuo Yamamura,<sup>\*a</sup> Yuuki Sugiyama,<sup>a</sup> Kensuke Murata,<sup>a</sup> Takanori Yokoi,<sup>a</sup> Ryuji Kurata,<sup>a</sup> Atsushi Miyagawa,<sup>a</sup> Kenji Sakamoto,<sup>b</sup> Keiko Komagoe,<sup>b</sup> Tsuyoshi Inoue,<sup>b</sup> and Takashi Katsu<sup>b</sup>

<sup>a</sup> Graduate School of Engineering, Nagoya Institute of Technology, Gokiso-cho, Showa-ku, Nagoya 466-8555 (Japan)

<sup>b</sup> Graduate School of Medicine, Dentistry and Pharmaceutical Sciences, Okayama University 1-1-1 Tsushima-naka, Kita-ku, Okayama 700-8530 (Japan)

E-mail: yamamura.hatsuo@nitech.ac.jp

### 1. Synthesis of Compounds

#### General

<sup>1</sup>H NMR spectra were recorded at 30 °C on a Bruker AVANCE400Plus Nanobay. Matrix-assisted laser desorption/ionization-time of flight (MALDI-TOF) mass measurements were conducted using a JEOL JMS-S3000 spectrometer. A Biotage Initiator EXP microwave reactor was used for the Huisgen reactions.

#### Benzylamino derivative **3**

A reaction solution was prepared by dissolving octaazido- $\gamma$ -CD derivative **2** (52.2 mg,  $3.49 \times 10^{-5}$  mol) in DMSO-H<sub>2</sub>O (10:1) (10 cm<sup>3</sup>) containing *N*-benzyl-*N*-2-propynylamine (53 mg, 1.25 mol eq. to the azide group), CuSO<sub>4</sub> 5H<sub>2</sub>O (6.7 mg, 0.1 mol eq.), and sodium ascorbate (69.2 mg, 1.25 mol eq.). After MW heating (120 °C, 20 min), water (50 dm<sup>3</sup>) was added and the solution lyophilized. The residue was washed with acetone and 10% aq. NH<sub>3</sub> and then lyophilized to give **3** (71.8 mg, 77%): <sup>1</sup>H NMR (400 MHz, [D<sub>6</sub>]DMSO):  $\delta$  5.12 (H1), 7.22 (Hphenyl), 7.73 (Htriazole), MS (MALDI): *m/z* 2659.3 [M + H]<sup>+</sup>, 2780.9 [M + Na]<sup>+</sup>, Found: C, 53.82; H, 5.93; N, 15.51%. Calcd for C<sub>128</sub>H<sub>161</sub>N<sub>32</sub>O<sub>32</sub>+10.1 H<sub>2</sub>O: C, 54.12; H, 6.39; N, 15.78%.

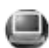

### Phenylpentylamino derivative 5

A reaction solution was prepared by dissolving octaazido- $\gamma$ -CD derivative **2** (200 mg,  $1.34 \times 10^{-4}$  mol) in DMSO-H<sub>2</sub>O (10:1) (22 cm<sup>3</sup>) containing *N*-phenylpentyl-*N*-2-propynylamine (297 mg, 1.25 mol eq. to the azide group), CuSO<sub>4</sub> 5H<sub>2</sub>O (26.8 mg, 0.1 mol eq.), and sodium ascorbate (265 mg, 1.25 mol eq.). After MW heating (120 °C, 90 min) and filtration, the solution was concentrated in vacuo. The residue was then washed with acetone and 10% aq. NH<sub>3</sub> and lyophilized to give **5** (361 mg, 87%): <sup>1</sup>H NMR (400 MHz, [D<sub>6</sub>]DMSO):  $\delta$  1.21-1.48 (H<sub>CH<sub>2</sub></sub>), 5.09 (H1), 7.11-7.21 (Hphenyl), 7.73 (Htriazole), MS (MALDI): *m/z* 3144.6 [M + K]<sup>+</sup>, Found: C, 60.17; H, 7.01; N, 12.96%. Calcd for C<sub>160</sub>H<sub>224</sub>N<sub>32</sub>O<sub>32</sub>+7.4H<sub>2</sub>O: C, 59.29; H, 7.43; N, 12.83%.

### Cyclohexylmethylamino derivative 6

A reaction solution was prepared by dissolving octaazido- $\gamma$ -CD derivative **2** (200 mg,  $1.34 \times 10^{-4}$  mol) in DMSO-H<sub>2</sub>O (10:1) (22 cm<sup>3</sup>) containing *N*-cyclohexylmethyl-*N*-2-propynylamine (250 mg, 1.5 mol eq. to an azide group), CuSO<sub>4</sub> 5H<sub>2</sub>O (26.8 mg, 0.1 mol eq.), and sodium ascorbate (265 mg, 1.25 mol eq.). After MW heating (120°C, 10 min) treatment followed by filtration, the solution was concentrated in vacuo. The residue was washed with acetone and 10% aq. NH<sub>3</sub> and lyophilized to give **6** (312 mg, 86%): <sup>1</sup>H NMR (400 MHz, DMSO-d<sub>6</sub>):  $\delta$  0.78-1.59 (Hcyclohexyl), 2.27-2.22 (H<sub>CH<sub>2</sub></sub>-cyclohexyl), 5.09 (H1), 7.73 (Htriazole), MS (MALDI): *m/z* 2744.7 [M + K]<sup>+</sup>, Found: C, 54.47; H, 7.35; N, 15.04%. Calcd for C<sub>128</sub>H<sub>210</sub>N<sub>32</sub>O<sub>32</sub>+7.5H<sub>2</sub>O: C, 54.09; H, 7.91; N, 15.77%.

### Cyclopentylmethylamino derivative 8

A reaction solution was prepared by dissolving per-2,3-acetylated  $\gamma$ -CD octaazide **11** (50 mg,  $2.30 \times 10^{-5}$  mol) in DMSO-H<sub>2</sub>O (26:3) (2.6 cm<sup>3</sup>) containing *N*-Boc-*N*-cyclopentylmethyl-*N*-2-propynylamine (55 mg, 1.25 mol eq. to the azide group), CuSO<sub>4</sub> 5H<sub>2</sub>O (4.57 mg, 0.1 mol eq.), and sodium ascorbate (45.2 mg, 1.25 mol eq.). After MW heating (120°C, 10 min), ethyl acetate was added followed by washing with 5% aq. EDTA. Silica gel column chromatography (hexane/ethyl acetate) gave the click reaction product (60.1 mg, 64.2%). Deprotection of the Boc group with TFA followed by removal of the acetyl groups with NaOMe-MeOH gave the desired product **8** in (76.7%): <sup>1</sup>H NMR (400 MHz, DMSO-d<sub>6</sub>):  $\delta$  1.15, 1.48, 1.55, 1.72, 2.09 (Hcyclopentyl), 2.85 (H<sub>CH<sub>2</sub></sub>-cyclopentyl), 5.10 (H1), 8.08 (Htriazole), MS (MALDI): *m/z* 2594.4702 [M + H]<sup>+</sup>, 2616.4516 [M + K]<sup>+</sup>, Found: C, 44.65; H, 5.89; N, 11.34%. Calcd for C<sub>120</sub>H<sub>192</sub>N<sub>32</sub>O<sub>32</sub>+Na+2.6H<sub>2</sub>O+10.3TFA: C, 44.25; H, 5.48; N, 11.74%.

### Cyclobutylmethylamino derivative 9

A reaction solution was prepared by dissolving per-2,3-acetylated  $\gamma$ -CD octaazide **11** (30.8 mg, 1.42

$\times 10^{-5}$  mol) in DMSO–H<sub>2</sub>O (15:4) (3.8 cm<sup>3</sup>) containing *N*-Boc-*N*-cyclobutylmethyl-*N*-2-propynylamine (32.1 mg, 1.25 mol eq. to the azide group), CuSO<sub>4</sub> 5H<sub>2</sub>O (7.2 mg, 0.2 mol eq.), and sodium ascorbate (53.8 mg, 2.5 mol eq.). After MW heating (120 °C, 30 min), ethyl acetate was added followed by washing with 5% aq. EDTA. Silica gel column chromatography (CH<sub>2</sub>Cl<sub>2</sub>/methanol) gave the click reaction product (44.5 mg, 79.3%). Deprotection of the Boc group with TFA followed by removal of the acetyl groups with NaOMe–MeOH gave the desired product **9** in (86.6%): <sup>1</sup>H NMR (400 MHz, [D<sub>6</sub>]DMSO):  $\delta$  1.68-1.87, 2.01-2.02, 2.53-2.61 (Hcyclobutyl), 2.94 (H<sub>CH2</sub>-cyclobutyl), 5.10 (H1), 8.07 Htriazole), MS (MALDI): m/z 2482.8240 [M + H]<sup>+</sup>, 2504.7950 [M + Na]<sup>+</sup>, Found: C, 41.44; H, 5.45; N, 11.60%. Calcd for C<sub>112</sub>H<sub>176</sub>N<sub>32</sub>O<sub>32</sub>+Na+11.5 H<sub>2</sub>O +11TFA: C, 41.39; H, 5.50; N, 11.70%.

### Cyclopropylmethylamino derivative **10**

A reaction solution was prepared by dissolving per-2,3-acetylated  $\gamma$ -CD octaazide **11** (50 mg,  $2.30 \times 10^{-5}$  mol) in DMSO–H<sub>2</sub>O (5:1) (2.4 cm<sup>3</sup>) containing *N*-Boc-*N*-cyclopropylmethyl-*N*-2-propynylamine (48.1 mg, 1.25 mol eq. to the azide group), CuSO<sub>4</sub> 5H<sub>2</sub>O (91.2 mg, 2.5 mol eq.), and sodium ascorbate (9.16 mg, 0.2 mol eq.). After MW heating (120 °C, 30 min), ethyl acetate was added followed by washing with 5% aq. EDTA. Silica gel column chromatography (CH<sub>2</sub>Cl<sub>2</sub>/methanol) gave the click reaction product (70.4 mg, 80.0%). Deprotection of the Boc group with TFA followed by removal of the acetyl groups with NaOMe–MeOH gave the desired product **10** in (73.1%): <sup>1</sup>H NMR (400 MHz, [D<sub>6</sub>]DMSO):  $\delta$  0.29-0.31, 0.54-0.56 1.00 (Hcyclopropyl), 2.81 (H<sub>CH2</sub>-cyclobutyl), 5.10 (H1), 8.08 Htriazole), MS (MALDI): m/z 2370.6610 [M + H]<sup>+</sup>, 2392.6400 [M + Na]<sup>+</sup>, Found: C 40.52, H 5.25, N 11.80%. Calcd for C<sub>104</sub>H<sub>160</sub>N<sub>32</sub>O<sub>32</sub> + 10 H<sub>2</sub>O + 11 CF<sub>3</sub>COOH: C 40.35, H 5.19, N 12.14%.

## 2. Bacteria

*Staphylococcus aureus* FDA 209P, *Bacillus subtilis* 168, *Escherichia coli* K12 strain W3110, and *Salmonella typhimurium* LT2 were used in this study. *S. aureus* cells were grown at 37 °C in a nutrient broth. *B. subtilis* cells were grown at 37 °C in a medium containing 1% polypepton, 0.5% yeast extract, and 0.5% NaCl (pH was adjusted to 7 by adding NaOH). *E. coli* and *S. typhimurium* cells were grown at 37 °C in a minimal salt medium supplemented with 1% polypepton.

## 3 Minimum inhibitory concentrations (MICs)

MICs were determined using the liquid microdilution method with serially diluted (twofold) CDs. Cells ( $1 \times 10^4$ ) were cultured at 37 °C for 20 h in Mueller–Hinton broth (0.1 cm<sup>3</sup>) containing a CD

using a 96-well microtiter plate. MIC was determined as the lowest concentration of the CD at which cells were unable to grow.

#### **4 K<sup>+</sup> efflux and cell viability**

Cells were harvested in an exponential phase of growth, washed twice with buffer (100 mM choline chloride/50 mM Mops-Tris, pH 7.2) and suspended in this buffer at  $2 \times 10^9$  cells cm<sup>-3</sup>. The cells were then incubated with CD at 37 °C for 30 min, and the final volume of the cell suspension was 1 cm<sup>3</sup>. The viability of the cells was determined by counting the colonies. After incubation, 0.1 cm<sup>3</sup> of the cell suspension was taken, diluted with physiological saline, and dispersed on an agar plate prepared with 1% polypepton, 0.5% yeast extract, 0.5% NaCl, and 1.5% agar (pH was adjusted by adding 1 M NaOH). The colonies were counted after standing overnight at 37 °C. The remaining cell suspension was centrifuged, and the amount of K<sup>+</sup> in the supernatant was measured using a K<sup>+</sup>-selective electrode. Melittin (10 μM) and polymyxin B (200 μg cm<sup>-3</sup>) were used to determine the 100% level of K<sup>+</sup> efflux from *S. aureus* and *E. coli*, respectively. To disrupt the outer membrane structure of the *E. coli* cells, they were treated with 150 mM Tris-HCl (pH 7.2)/1 mM EDTA at 37 °C for 2 min.

#### **5 Hemolytic activity**

Rabbit erythrocytes were suspended in a buffer (150 mM NaCl/10 mM Hepes-NaOH, pH 7.4) at a final concentration of 0.5% hematocrit. After incubation with a CD at 37 °C for 30 min, the hemolysis was estimated by measuring the absorbance at 540 nm. Lysolecithin (50 μM) was used to determine the 100% level of hemolysis.
